# Supplementary material for: 2D carbon nitride as a support with single Cu, Ag, and Au atoms for carbon dioxide reduction reaction
Source: Royal Society of Chemistry journal article supplement (doi:10.1039/d3cp00392b), 2023-01-01
Supplement: d3cp00392b1.pdf [file d3cp00392b1.pdf]

## Supporting Information

### 2D Carbon Nitride as Support of Single Cu, Ag, and Au Atoms for Carbon Dioxide Reduction Reaction

Sergio Posada-Pérez,<sup>a\*</sup> Anna Vidal-López,<sup>a,b</sup> Miquel Solà,<sup>a</sup> and Albert Poater<sup>a\*</sup>

<sup>a</sup>Institut de Química Computacional i Catàlisi and Departament de Química, Universitat de Girona, c/ Maria Aurèlia Capmany 69, 17003 Girona, Catalonia, Spain.

<sup>b</sup>Departament de Química, Universitat Autònoma de Barcelona, 08193 Cerdanyola del Vallès, Catalonia, Spain.

**Corresponding author:** Sergio Posada-Pérez ([sergio.posada@udg.edu](mailto:sergio.posada@udg.edu)), Albert Poater ([alber.poater@udg.edu](mailto:alber.poater@udg.edu))

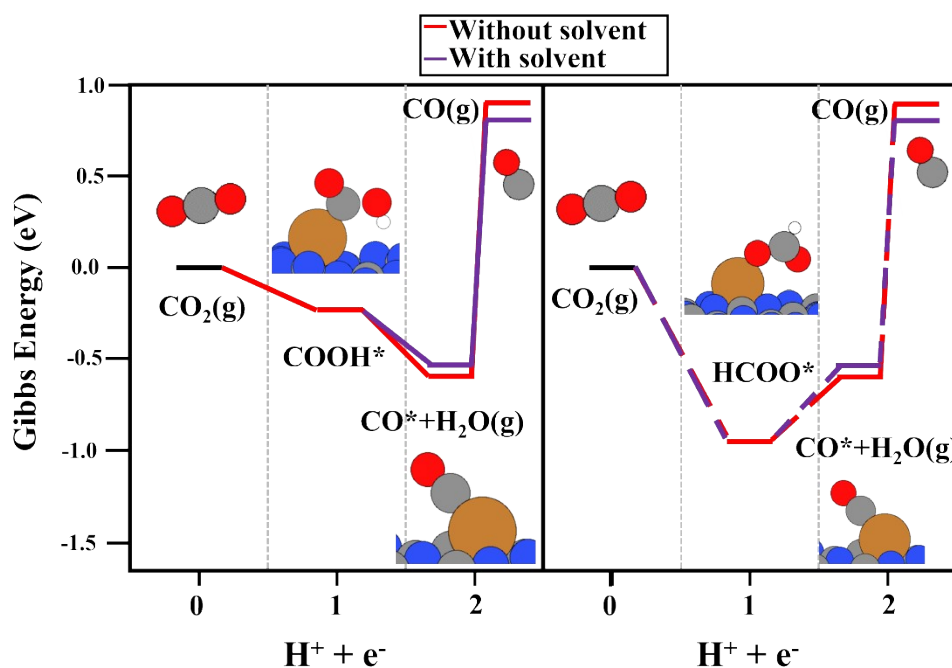

**Figure S1:** Reaction mechanism of CO<sub>2</sub>RR on bare Cu<sub>1</sub>@g-C<sub>3</sub>N<sub>4</sub> considering VASP calculations with and without solvent effects.

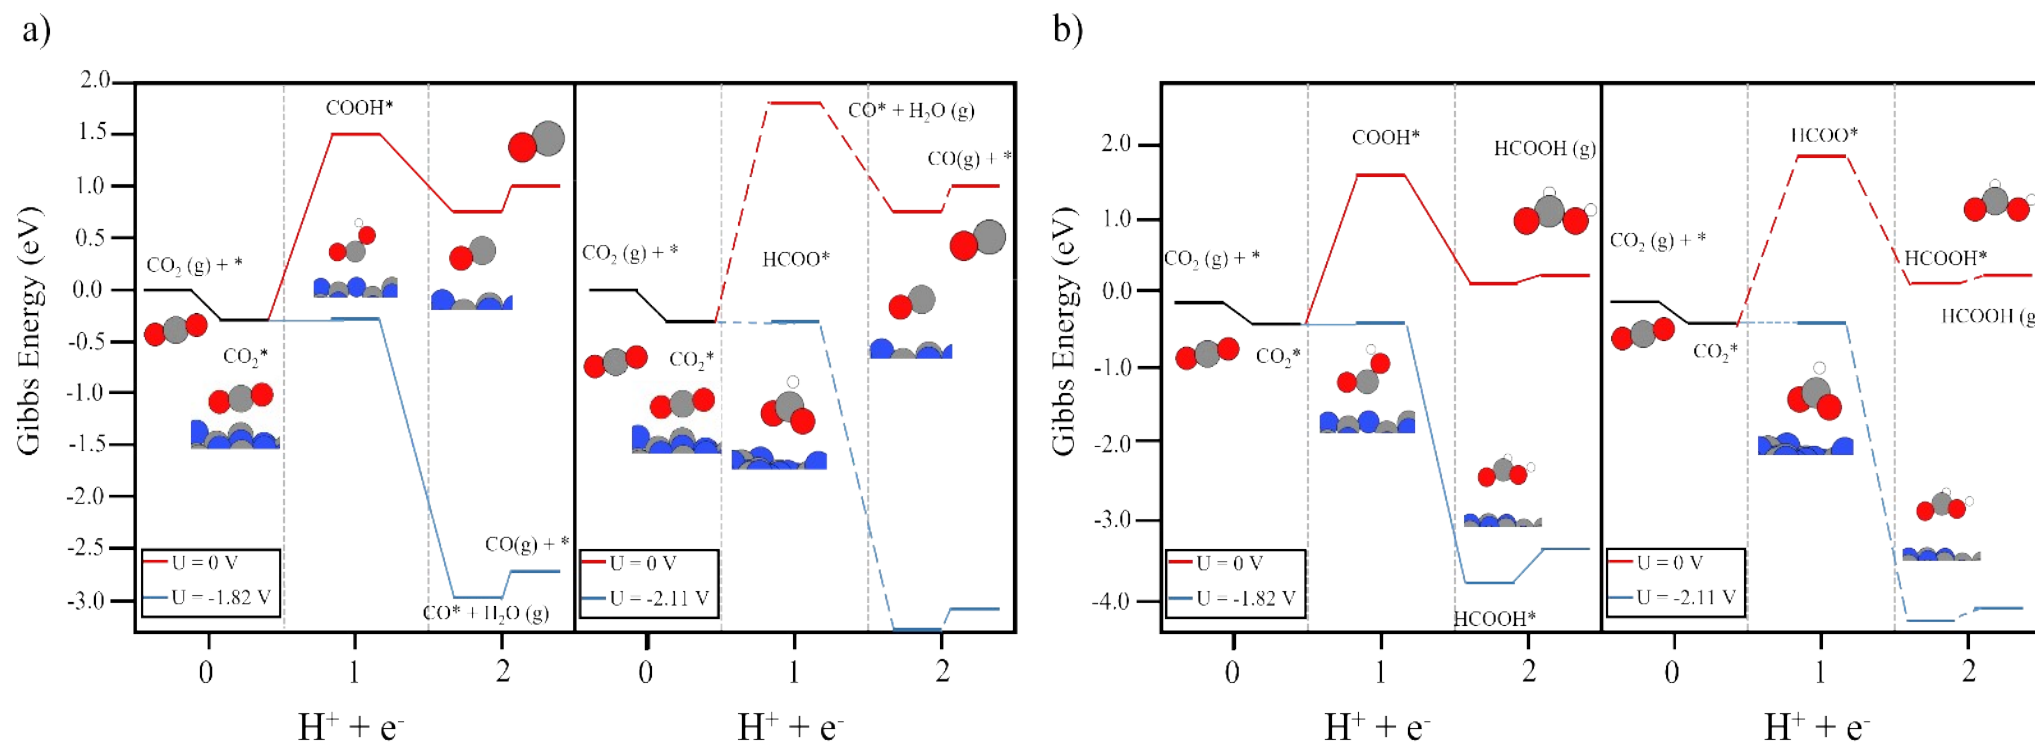

**Figure S2:** Reaction mechanism of  $CO_2RR$  on bare  $g-C_3N_4$  monolayer at 0V (red) and the limiting potential required to overcome the thermodynamic barriers (blue). These plots include the effect of  $CO_2$  and  $HCOOH$  adsorption energy, showing (a) the formation of CO and (b) the  $HCOOH$  production. Left and right panels illustrate the energy diagram considering the  $COOH$  (solid lines) and  $HCOO$  (dashed lines) intermediates, respectively.

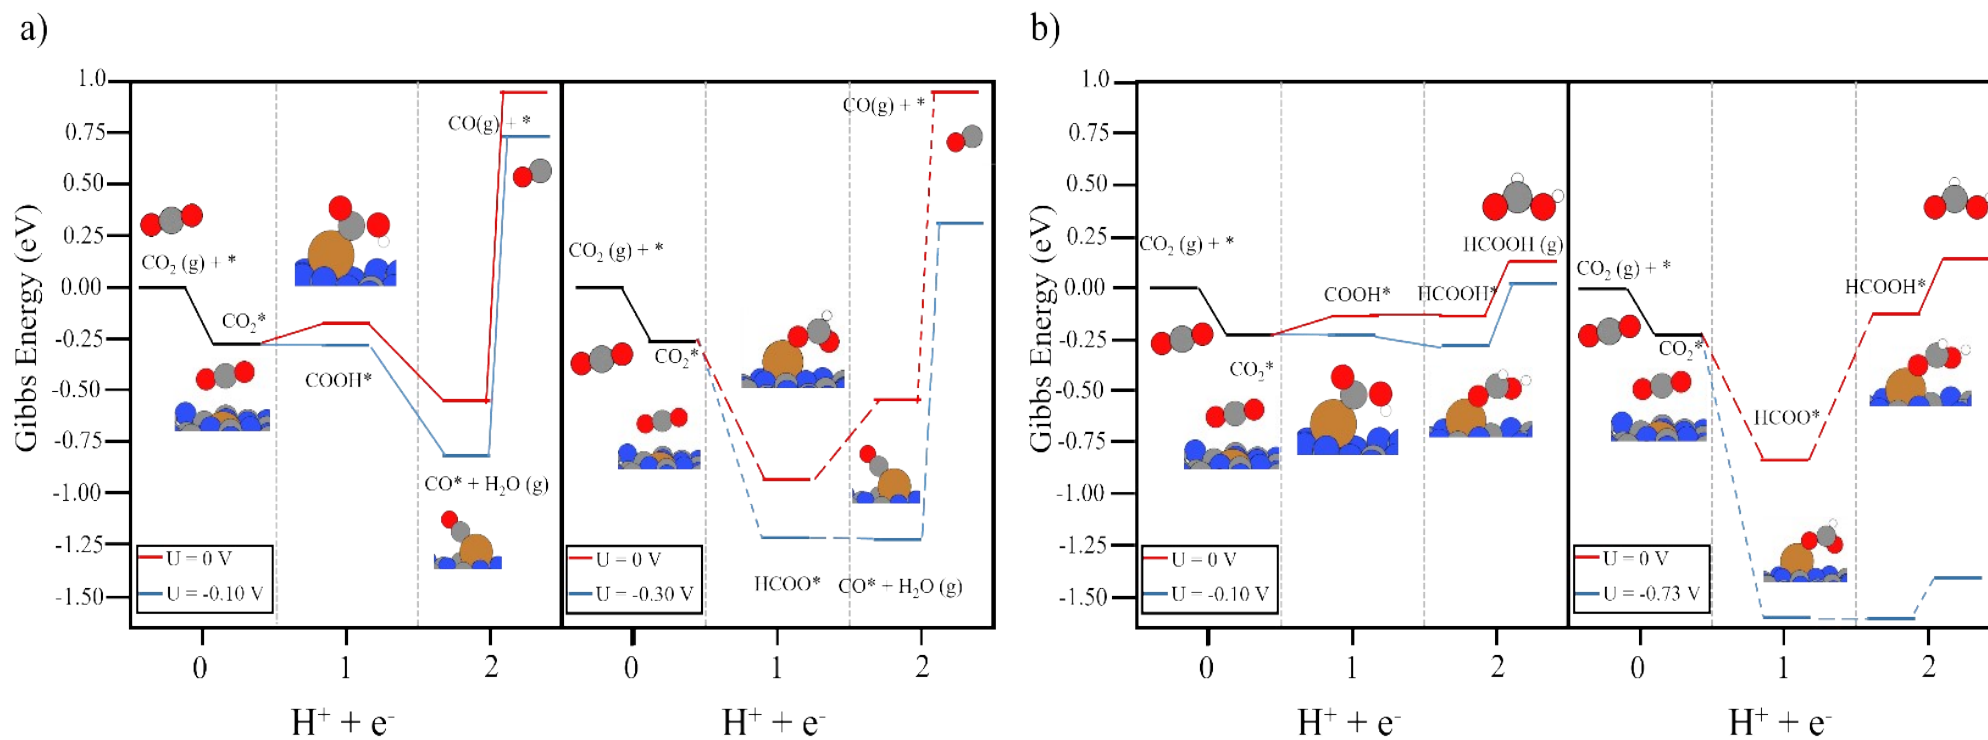

**Figure S3:** Reaction mechanism of CO<sub>2</sub>RR on Cu<sub>1</sub>@g-C<sub>3</sub>N<sub>4</sub> monolayer at 0V (red) and the limiting potential required to overcome the thermodynamic barriers (blue). These plots include the effect of CO<sub>2</sub> and HCOOH adsorption energy showing (a) the formation of CO and (b) the HCOOH production. Left and right panels illustrate the energy diagram considering the COOH (solid lines) and HCOO (dashed lines) intermediates, respectively.

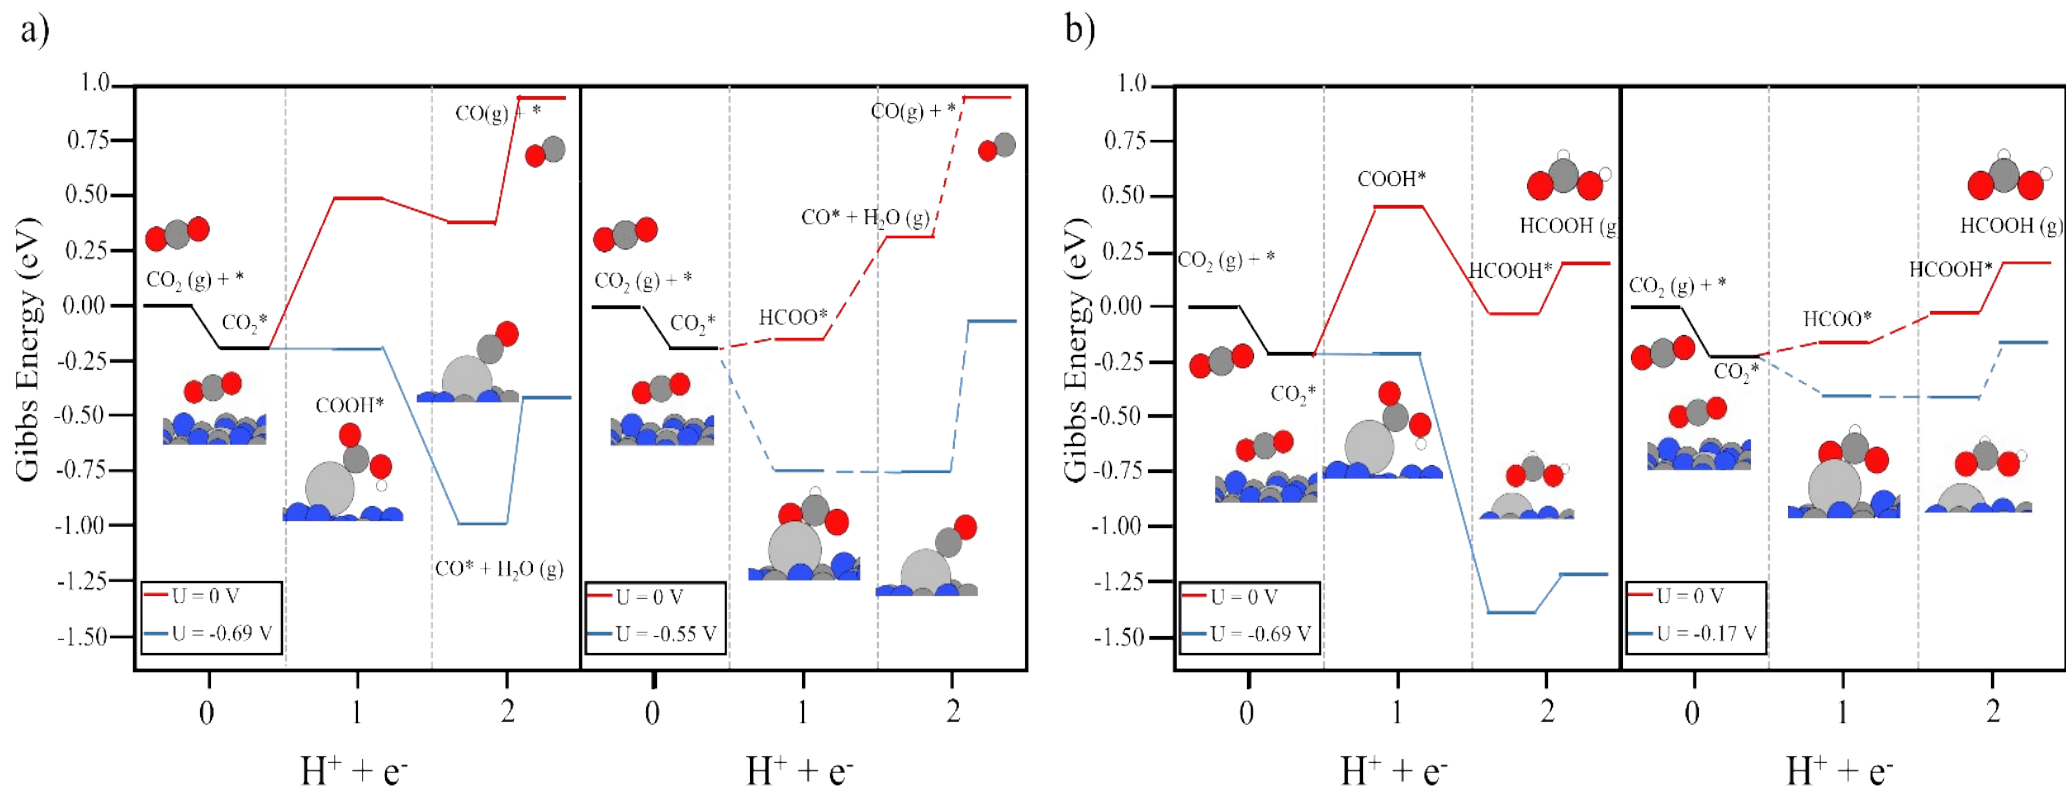

**Figure S4:** Reaction mechanism of CO<sub>2</sub>RR on Ag<sub>1</sub>@g-C<sub>3</sub>N<sub>4</sub> monolayer at 0V (red) and the limiting potential required to overcome the thermodynamic barriers (blue). These plots include the effect of CO<sub>2</sub> and HCOOH adsorption energy showing (a) the formation of CO and (b) the HCOOH production. Left and right panels illustrate the energy diagram considering the COOH (solid lines) and HCOO (dashed lines) intermediates, respectively.

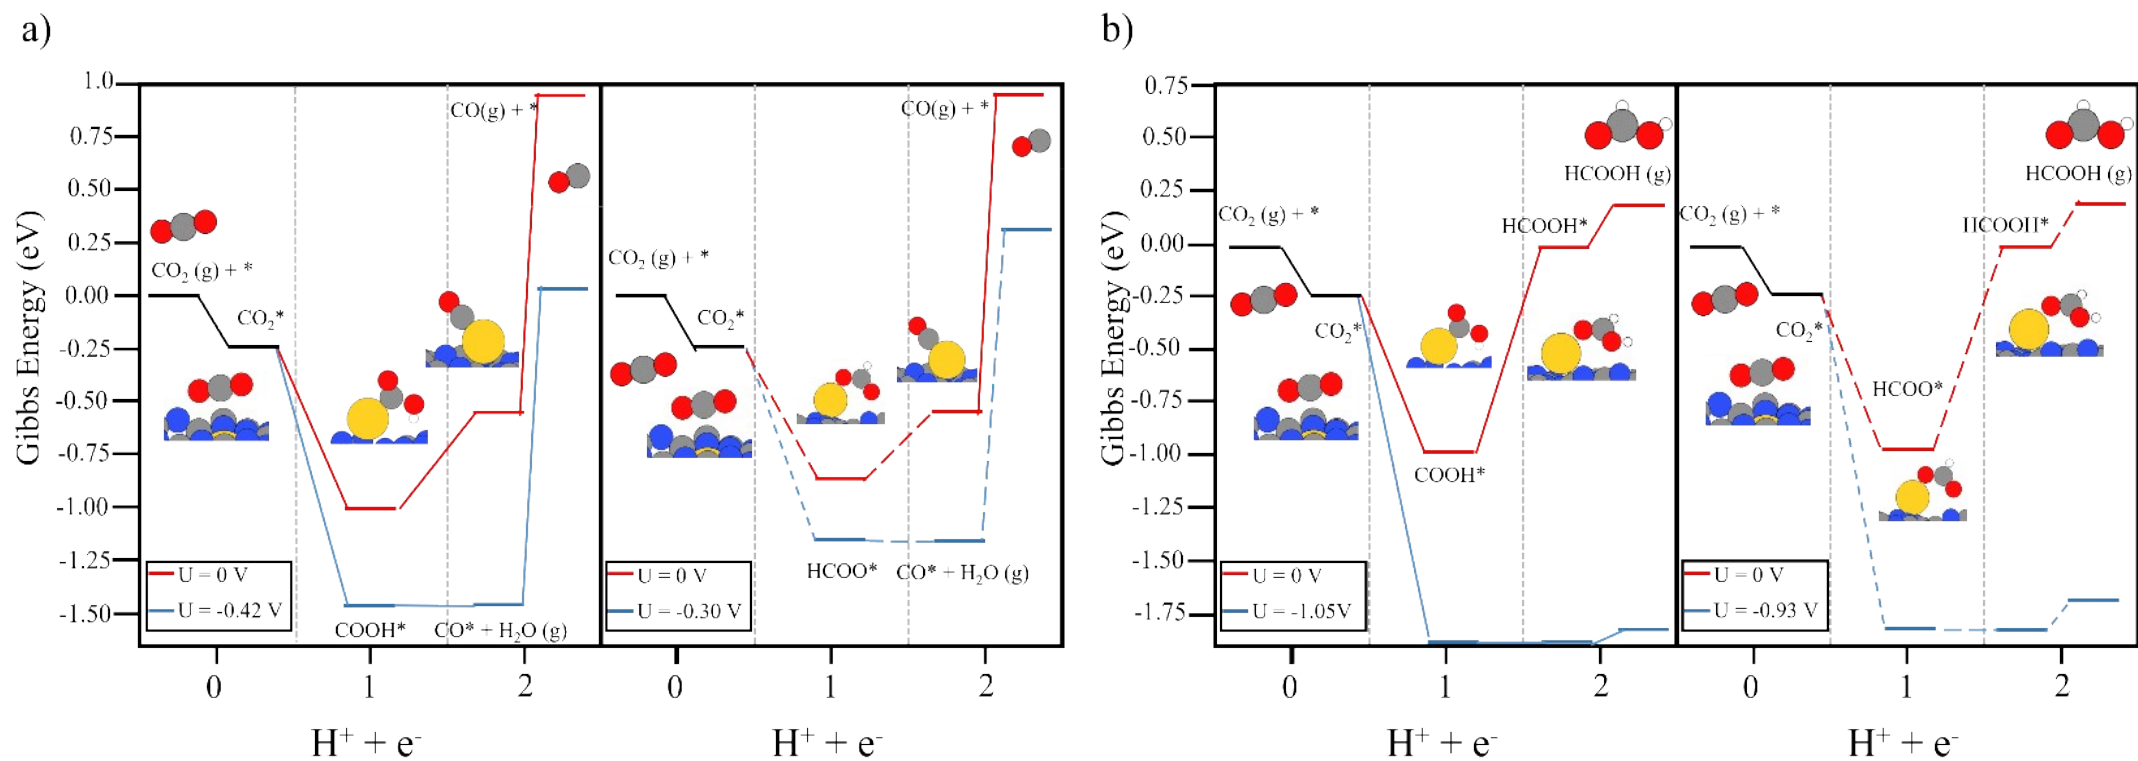

**Figure S5:** Reaction mechanism of CO<sub>2</sub>RR on Au<sub>1</sub>@g-C<sub>3</sub>N<sub>4</sub> monolayer at 0V (red) and the limiting potential required to overcome the thermodynamic barriers (blue). These plots include the effect of CO<sub>2</sub> and HCOOH adsorption energy showing (a) the formation of CO and (b) the HCOOH production. Left and right panels illustrate the energy diagram considering the COOH (solid lines) and HCOO (dashed lines) intermediates, respectively.
